# Supplementary material for: Comb Irradiation Has Limited, Interactive Effects on Colony Performance or Pathogens in Bees, Varroa destructor and Wax Based on Two Honey Bee Stocks
Source: PubMed Central journal article supplement (PMC6359134; doi:10.3390/insects10010015), 2019-01-08
Supplement: insects-10-00015-s001.pdf [file insects-10-00015-s001.pdf]

## Article

# Comb Irradiation Has Limited, Interactive Effects on Colony Performance or Pathogens in Bees, *Varroa destructor* and Wax Based on Two Honey Bee Stocks

Lilia I. de Guzman \*, Michael Simone-Finstrom \*, Amanda M. Frake and Philip Tokarz

Honey Bee Breeding, Genetics and Physiology Laboratory, USDA-ARS, Baton Rouge, LA 70820, USA; mandy.frake@ars.usda.gov (A.M.F.); philip.tokarz@ars.usda.gov (P.T.)

\* Correspondence: lilia.deguzman@ars.usda.gov (L.I.d.G.); michael.simonefinstrom@ars.usda.gov (M.S.-F.); Tel.: +1-225-767-9282 (L.I.d.G.)

Received: 28 September 2018; Accepted: 8 December 2018; Published: date

**Table S1.** Primer information.

|                        | fwd seq                            | rev seq                           | Reference                       |
|------------------------|------------------------------------|-----------------------------------|---------------------------------|
| AKI                    | CTT TCA TGA TGT GGA<br>AAC TCC     | AAA CTG AAT AAT<br>ACT GTG CGT A  | Francis & Kryger 2012           |
| <i>A. apis</i>         | TCT GGC GGC CGG TTA<br>AAG GCT TC  | GTT TCA AGA CGG<br>GCC ACA AAC    | Evans <i>et al.</i> 2006        |
| EFB                    | TGT TGT TAG AGA AGA<br>ATA GGG GAA | CGT GGC TTT CTG GTT<br>AGA        |                                 |
| LSV-Univ               | CGT GCG GAC CTC ATT<br>TCT TCA TGT | CTG CGA AGC ACT<br>AAA GCG TT     | Daughenbaugh <i>et al.</i> 2015 |
| Nosema-Both            | AGC AGC CGC GGT<br>AAT ACT TGT TC  | GTT CGT CCA GTC AGG<br>GTC GT     | Alburaki <i>et al.</i> 2018     |
| <i>P. larvae</i> RPS18 | TTC ACG GCT AAC<br>AAA ATT AAA CA  | TTC GCA GAA GTT CCG<br>GTT AC     | Boncristiani <i>et al.</i> 2012 |
| VDV-1 CP               | CTG TAG TTA AGC GGT<br>TAT TAG AA  | GGT GCT TCT GGA<br>ACA GCG GAA    | Ryabov <i>et al.</i> 2017       |
| BQCV                   | TCG CAG AGT TCC<br>AAA TAC CG      | TAT CAT CTC CCG CAC<br>CTA CC     | Yoo <i>et al.</i> 2008          |
| CBPV                   | CGC AAG TAC GCC TTG<br>ATA AAG AAC | ACT ACT AGA AAC<br>TCG TCG CTT CG | Blanchard <i>et al.</i> 2007    |
| DWV-1                  | GAG ATT GAA GCG<br>CAT GAA CA      | TGA ATT CAG TGT CGC<br>CCA TA     | Boncristiani <i>et al.</i> 2012 |
| Pros54                 | TCG AAC CAA GAT<br>GGT ACT GGA A   | TTG TTG TGC TTG CAG<br>TCG TG     | Cameron <i>et al.</i> 2013      |
| VgMC                   | AGT TCC GAC CGA<br>CGA CGA         | TTC CCT CCC ACG GAG<br>TCC        | Evans <i>et al.</i> 2006        |

**Table S2.** ANOVA parameters for main effects and associated interactions for adult population, total brood cells and mite population in 2015 and 2016.

| Year | Effect               | Adult Population |          | Total Brood Cells |       | Mite Population |          |
|------|----------------------|------------------|----------|-------------------|-------|-----------------|----------|
|      |                      | F                | P        | F                 | P     | F               | P        |
| 2015 | Date                 | 99.32            | < 0.0001 | 9.26              | 0.003 | 24.35           | < 0.0001 |
|      | Stock                | 0.84             | 0.362    | 1.70              | 0.198 | 7.87            | 0.007    |
|      | Date*Stock           | 0.04             | 0.836    | 0.24              | 0.625 | 3.47            | 0.068    |
|      | Treatment            | 6.42             | 0.014    | 1.34              | 0.252 | 3.59            | 0.063    |
|      | Date*Treatment       | 0.05             | 0.822    | 3.86              | 0.054 | 2.26            | 0.138    |
|      | Stock*Treatment      | 0.02             | 0.876    | 0.01              | 0.921 | 1.63            | 0.207    |
|      | Date*Stock*Treatment | 0.03             | 0.857    | 1.07              | 0.305 | 1.65            | 0.205    |
| 2016 | Date                 | 9.76             | 0.0002   | 4.81              | 0.011 | 21.05           | < 0.0001 |
|      | Stock                | 0.56             | 0.456    | 0.70              | 0.406 | 22.38           | < 0.0001 |
|      | Date*Stock           | 1.55             | 0.22     | 0.22              | 0.806 | 4.21            | 0.018    |
|      | Treatment            | 0.63             | 0.43     | 0.05              | 0.818 | 0.16            | 0.694    |
|      | Date*Treatment       | 0.36             | 0.698    | 0.28              | 0.76  | 0.09            | 0.910    |
|      | Stock*Treatment      | 1.74             | 0.191    | 3.36              | 0.071 | 0.00            | 0.998    |
|      | Date*Stock*Treatment | 2.53             | 0.086    | 0.52              | 0.597 | 0.02            | 0.982    |



**Table S4.** Summary of the correlation analyses for newly emerged bees and wax sampled from the same comb. With Bonferoni correction, a *p*-value < 0.006 indicates significance as indicated in bold type.

| Treatment Type                 | VDV1                                   | DWV                    | BQCV                   | CBPV                   | Total Pathogens Detected |
|--------------------------------|----------------------------------------|------------------------|------------------------|------------------------|--------------------------|
| Non-irradiated                 | <b>r = 0.730,</b><br><b>p&lt;.001</b>  | r = -0.202,<br>p=0.394 | r = 0.201,<br>p=0.395  | r = 0.205,<br>p=0.387  | r = 0.246,<br>p=0.295    |
| Irradiated                     | r = 0.406,<br>p=0.118                  | r = -0.230,<br>p=0.391 | r = 0.039,<br>p=0.887  | r = 0.301,<br>p=0.258  | r = 0.070,<br>p=0.798    |
| Italian                        | <b>r = 0.858,</b><br><b>p&lt;.0001</b> | r = -0.182,<br>p=0.456 | r = 0.054,<br>p=0.825  | r = -0.084,<br>p=0.731 | r = 0.306,<br>p=0.202    |
| Russian                        | r = 0.110,<br>p=0.675                  | r = -0.256,<br>p=0.321 | r = 0.041,<br>p=0.875  | r = 0.322,<br>p=0.207  | r = 0.076,<br>p=0.771    |
| Italian, non-irradiated (n=10) | <b>r = 0.910,</b><br><b>p&lt;.001</b>  | r = -0.167,<br>p=0.646 | r = 0.383,<br>p=0.275  | r = 0.388,<br>p=0.268  | r = 0.382,<br>p=0.277    |
| Italian, irradiated (n=9)      | <b>r = 0.842,</b><br><b>p=0.004</b>    | r = -0.189,<br>p=0.626 | r = -0.208,<br>p=0.592 | r = 0.081,<br>p=0.836  | r = 0.046,<br>p=0.906    |
| Russian, non-irradiated (n=10) | r = 0.248,<br>p=0.489                  | r = -0.249,<br>p=0.487 | r = -0.072,<br>p=0.842 | r = -0.121,<br>p=0.740 | r = 0.059,<br>p=0.871    |
| Russian, irradiated (n=7)      | r = -0.479,<br>p=0.277                 | r = -0.258,<br>p=0.576 | r = 0.505,<br>p=0.247  | r = 0.566,<br>p=0.8185 | r = 0.108,<br>p=0.818    |

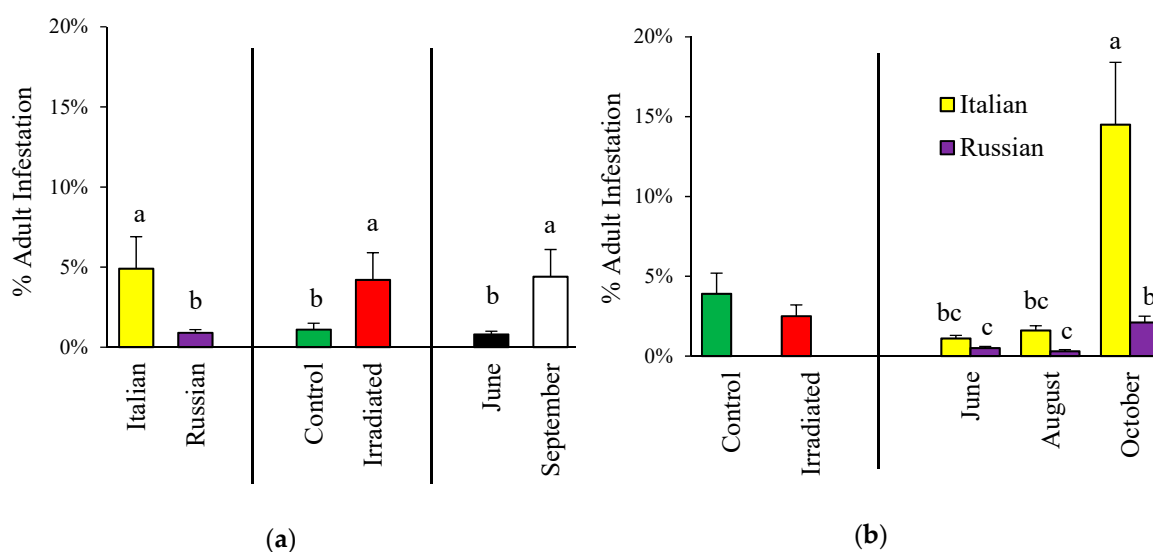

**Figure S1.** Prevalence (mean ± SE) of *Varroa* on adult bees in Italian and Russian honey bee colonies having irradiated or non-irradiated (control) combs in (a) 2015 and (b) 2016. For each group, bars with the same letters are not significantly different (*p* > 0.05); without letters indicates no differences.

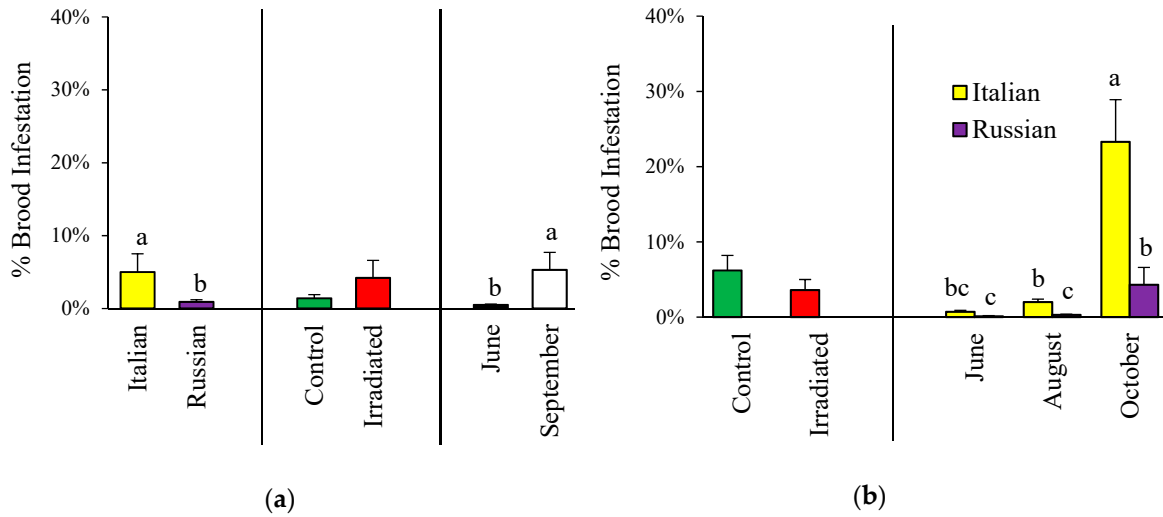

**Figure S2.** Prevalence (mean ± SE) of *Varroa* in sealed brood of Italian and Russian honey bee colonies having irradiated or non-irradiated (control) combs in (a) 2015 and (b) 2016. For each group, bars with the same letters are not significantly different ( $p > 0.05$ ); without letters indicates no differences.

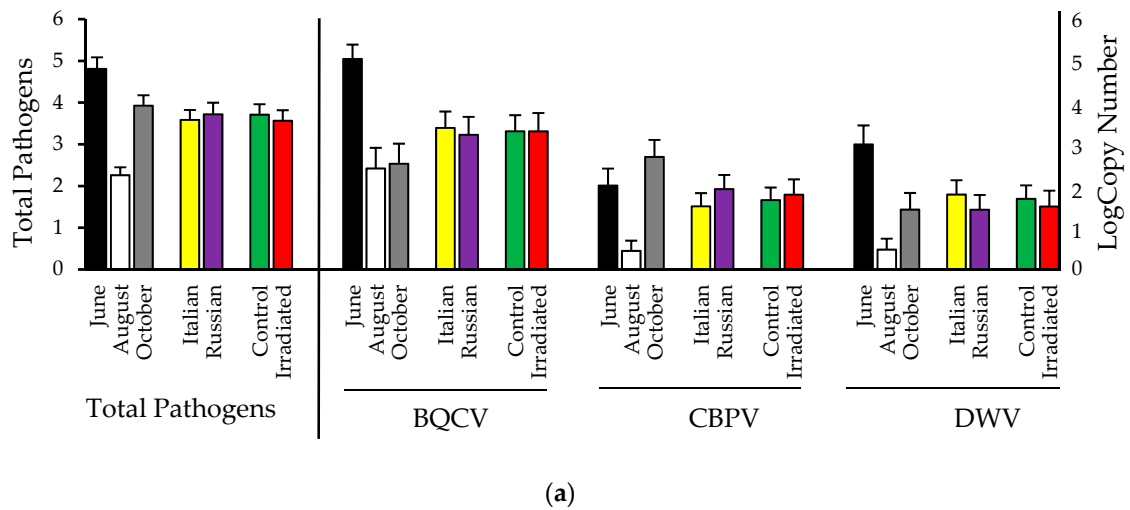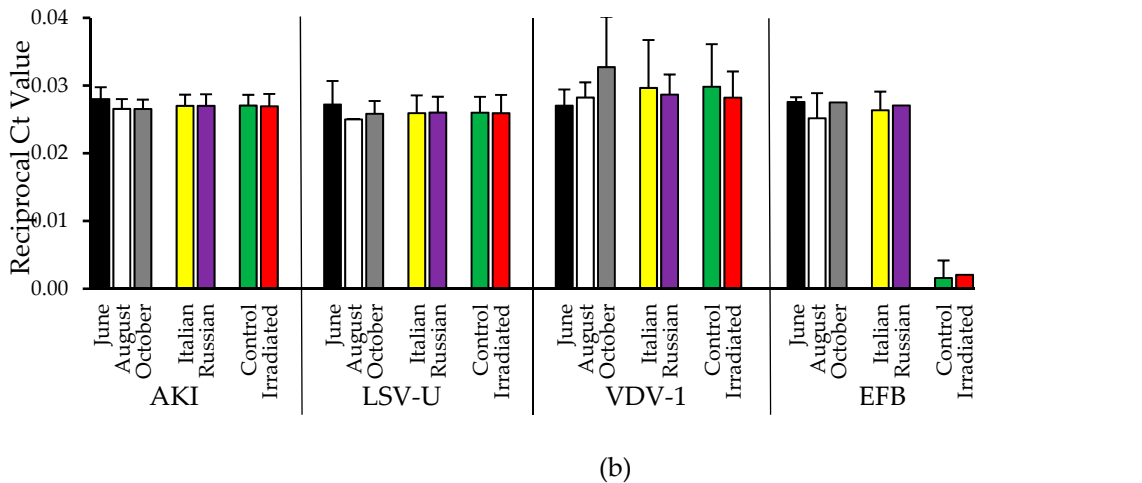

**Figure S3.** Levels (mean ± SE) of wax-borne pathogens by season, stock and comb treatment (control or irradiated)
